# 1 A framework for evaluating edited cell 2 libraries created by massively parallel 3 genome engineering

4 **Author list:** Simon Cawley<sup>1</sup>, Eric Abbate<sup>1</sup>, Christopher G. Abraham<sup>1</sup>, Steven Alvarez<sup>1</sup>, Mathew  
5 Barber<sup>1</sup>, Scott Bolte<sup>1</sup>, Jocelyne Bruand<sup>1</sup>, Deanna M. Church<sup>1</sup>, Clint Davis<sup>1</sup>, Matt Estes<sup>1</sup>, Stephen  
6 Federowicz<sup>1,2</sup>, Richard Fox<sup>1,3</sup>, Miles W. Gander<sup>1,4</sup>, Andrew D. Garst<sup>1,3</sup>, Gozde Gencer<sup>1</sup>, Paul  
7 Hardenbol<sup>1</sup>, Thomas Hraha<sup>1</sup>, Surbhi Jain<sup>1</sup>, Charlie Johnson<sup>1</sup>, Kara Juneau<sup>1</sup>, Nandini  
8 Krishnamurthy<sup>1</sup>, Shea Lambert<sup>1</sup>, Bryan Leland<sup>1</sup>, Francesca Pearson<sup>1</sup>, J. Christian J. Ray<sup>1</sup>, Chad  
9 D. Sanada<sup>1</sup>, Timothy M. Shaver<sup>1</sup>, Tyson R. Shepherd<sup>1</sup>, Eileen C. Spindler<sup>1</sup>, Craig A. Struble<sup>1</sup>,  
10 Maciej H. Swat<sup>1</sup>, Stephen Tanner<sup>1</sup>, Tian Tian<sup>1</sup>, Ken Wishart<sup>1</sup>, Michael S. Graige<sup>1</sup>

11 <sup>1</sup>Inscripta, Inc., Boulder, CO 80301

12 <sup>2</sup>IDEAYA Biosciences, South San Francisco, CA 94080

13 <sup>3</sup>Infinome Biosciences, Boulder, CO, 80301

14 <sup>4</sup>Absci Corp, Vancouver, WA 98683

## 15 Abstract

16 Genome engineering methodologies are transforming biological research and discovery.  
17 Approaches based on CRISPR technology have been broadly adopted and there is growing  
18 interest in the generation of massively parallel edited cell libraries. Comparing the libraries  
19 generated by these varying approaches is challenging and researchers lack a common  
20 framework for defining and assessing the characteristics of these libraries. Here we describe a  
21 framework for evaluating massively parallel libraries of edited genomes based on established  
22 methods for sampling complex populations. We define specific attributes and metrics that are  
23 informative for describing a complex cell library and provide examples for estimating these  
24 values. We also connect this analysis to generic phenotyping approaches, using either pooled  
25 (typically via a selection assay) or isolate (often referred to as screening) phenotyping  
26 approaches. We approach this from the context of creating massively parallel, precisely edited  
27 libraries with one edit per cell, though the approach holds for other types of modifications,  
28 including libraries containing multiple edits per cell (combinatorial editing). This framework is a  
29 critical component for evaluating and comparing new technologies as well as understanding  
30 how a massively parallel edited cell library will perform in a given phenotyping approach.

## 31 Introduction

32 Genome engineering methodologies are transforming biological research and discovery.  
33 Approaches based on CRISPR technology have been broadly adopted due to the relative ease  
34 of targeting defined genomic regions using specific guide RNAs (gRNAs) (Jinek et al. 2012).  
35 While there has been a large focus on modifying one or a small number of sites for translational  
36 research and therapeutics, there is growing interest in the generation of massively parallel  
37 edited cell libraries (Ding et al. 2014; Frangoul et al. 2020; Wilkinson et al. 2021). These libraries  
38 can accelerate the pace of genome discovery or cell engineering by allowing for the  
39 simultaneous interrogation of hundreds to thousands of loci in a single experiment. Current  
40 genome-wide approaches typically either leverage knock-out libraries – largely relying on  
41 error-prone repair processes for sequence disruptions – or rely on transcriptional modulation  
42 by tethering a nuclease-deficient Cas9 with a transcriptional repressor or activator to modulate  
43 gene expression (Mali et al. 2013; Cong et al. 2013; Gilbert et al. 2014). Recently, the generation  
44 of genome-wide libraries of precise edits has been described in microbes and human (Garst et  
45 al. 2017; Sadhu et al. 2018; Bao et al. 2018; Sharon et al. 2018; Hanna et al. 2021). This ability to  
46 make more refined changes will provide greater precision and information around genotype-  
47 phenotype relationships. Comparing the libraries generated by these varying approaches is  
48 challenging and groups typically take different approaches and measures in reporting their  
49 work. What is currently lacking is a common framework for defining and assessing the  
50 characteristics of these libraries.

51 The evaluation of these complex libraries can be challenging. The library represents a mixed  
52 population, with some cells containing the desired edit and the remaining cells constituting a  
53 Burden Population (Table 1) of cells containing incomplete, unintended or no edits. The  
54 population of cells containing the designed edits will also be a mosaic, with individual edit  
55 representations being driven by the representation of the design in the reagent pool, the  
56 functionality of the guide, the edit rate at different loci and any fitness effects an edit may have  
57 on an individual cell. Frequently the efficiency of massively parallel editing experiments is  
58 extrapolated based on experiments where editing has been performed in isolates rather than  
59 in a pooled manner (Sadhu et al. 2018; Sharon et al. 2018). Although this methodology is more  
60 experimentally tractable, it is not necessarily predictive of performance in a pooled setting.  
61 Additional biological factors can strongly affect outcomes, such as differential growth rates of  
62 cells that have undergone the editing process, the introduction of edits that impair cell viability  
63 to varying degrees, cells in which no double-stranded break (DSB) is created and which thus  
64 grow faster, and cells in which a DSB is created with failure to repair leading to their depletion.  
65 All of these factors impact the final library composition. In general, it is preferable for a library  
66 to contain a high fraction of edited cells, with an even representation of edits. Understanding  
67 the library composition is critical for assessing if a cell library is fit for a given phenotyping  
68 regime, though in practice obtaining this information can be technically challenging or cost  
69 prohibitive.

70 Here we describe a framework for evaluating massively parallel libraries of edited genomes  
71 based on established methods for sampling complex populations. We define specific attributes  
72 and metrics that are informative for describing a complex cell library and provide examples for  
73 estimating these values. Obtaining all of these measures may be challenging or expensive, so

74 we also provide a theoretical framework to allow assessment of a given library in the absence  
75 of some desired data points. We also connect this analysis to generic phenotyping approaches,  
76 using either pooled (typically via a selection assay) or isolate (often referred to as screening)  
77 phenotyping approaches. We approach this from the context of creating massively parallel,  
78 precisely edited libraries with one edit per cell, though the approach holds for other types of  
79 modifications, including libraries containing multiple edits per cell (combinatorial editing). This  
80 framework is a critical component for evaluating and comparing new technologies as well as  
81 understanding how a massively parallel edited cell library will perform in a given phenotyping  
82 approach.

## 83 **Library Characterization**

84 Massively parallel genome engineering results in a library of cells, where most cells contain  
85 design reagents (that is, the combination of gRNA and repair template) encoding distinct edits.  
86 Each design reagent is represented in hundreds to thousands of cells. In microbial libraries,  
87 these reagents are often maintained as plasmids, while in mammalian libraries, episomes or  
88 genome-integrating vectors, such as lentivirus, must be used if the reagents are to be  
89 maintained within the population over the course of an experiment. A percentage of the  
90 population will contain the desired edits, while the remaining population constitutes a Burden  
91 Population. In order to characterize such a library, we must define and measure several  
92 characteristics. Table 1 provides a list of terms and measures useful for characterizing libraries.

93 **Table 1:** terms and definitions useful for characterizing complex cell libraries

| TERM                                           | DEFINITION                                                                                                                                                                                                                                                  |
|------------------------------------------------|-------------------------------------------------------------------------------------------------------------------------------------------------------------------------------------------------------------------------------------------------------------|
| <b>BURDEN POPULATION</b>                       | The population of cells in a library that is either unedited or contains unintended edits.                                                                                                                                                                  |
| <b>COMPLETE INTENDED EDIT</b>                  | A precise edit that includes all modifications specified in the repair template (sometimes referred to as the homology arm) with no additional unintended modifications (Figure 1).                                                                         |
| <b>EDIT COEFFICIENT OF VARIATION (EDIT CV)</b> | An aggregate measure across all the edits in a library, the coefficient of variation for the frequencies of the Complete Intended Edits in the edited cells of the library, defined as the standard deviation of edit frequencies normalized to their mean. |
| <b>EDIT FRACTION</b>                           | The fraction of cells in a library containing the Complete Intended Edit at the locus of interest (in a precise editing library) or an edit in the target region (in an imprecise editing library).                                                         |
| <b>EDIT FRACTIONAL RICHNESS</b>                | The Edit Richness (see below) scaled by the library size, a value in the range [0, 1].                                                                                                                                                                      |
| <b>EDIT RICHNESS</b>                           | The number of unique Complete Intended Edits present in a sample.                                                                                                                                                                                           |

|                                                      |                                                                                                                                                                                                                                        |
|------------------------------------------------------|----------------------------------------------------------------------------------------------------------------------------------------------------------------------------------------------------------------------------------------|
| <b>INTENDED EDIT</b>                                 | The modification of specific bases in a defined region of a genome.<br>( <a href="https://www.nist.gov/programs-projects/nist-genome-editing-lexicon#3.4">https://www.nist.gov/programs-projects/nist-genome-editing-lexicon#3.4</a> ) |
| <b>REAGENT COEFFICIENT OF VARIATION (REAGENT CV)</b> | An aggregate measure across all the editing reagents in a library, the coefficient of variation for the frequencies of the editing reagents (typically plasmids, episomes or virus) in the library. Defined as for Edit CV             |
| <b>REAGENT FRACTIONAL RICHNESS</b>                   | The Reagent Richness (see below) scaled by the library size, a value in the range [0, 1].                                                                                                                                              |
| <b>REAGENT RICHNESS</b>                              | The number of unique reagents present in a sample.                                                                                                                                                                                     |
| <b>SCREENER'S SCORE</b>                              | The predicted Edit Fractional Richness for a 1x screen (number of isolates screened = number of designs in library) assuming a 30% Edit Fraction.                                                                                      |
| <b>SELECTOR'S SCORE</b>                              | The predicted Edit Fractional Richness for a selection assuming $1 \times 10^6$ cells and 30% Edit Fraction.                                                                                                                           |

## 94 **Definitions Useful for Library Characterization**

### 95 **Defining an edit**

96 When using CRISPR-Cas based systems to generate a desired sequence variant through  
97 precise editing, a guide and repair template are defined (commonly through software). In  
98 many cases, auxiliary edits to the PAM site are included to prevent the nuclease from recutting  
99 the edited locus. We define a 'Complete Intended Edit' as an instance where the repair  
100 template sequence (the desired variant and any auxiliary edits) is faithfully and completely  
101 placed into the genome (Figure 1). Cases where only part of the repair template sequence is  
102 conferred to the genome are classified as incomplete edits and are considered part of the  
103 burden, though there will be differences from the reference sequence. Unintended events,  
104 either occurring at the edit locus or elsewhere in the genome, are also considered part of the  
105 Burden Population along with unedited cells.

106 When producing imprecise edits, such as in the case of non-homologous end joining (NHEJ)-  
107 mediated knockout libraries, the concept of a Complete Intended Edit is not relevant.  
108 However, in this case, the desired events would be insertion-deletion events occurring at the  
109 target site. Events that do not lead to a true loss of functional protein (knockout) or that  
110 happen outside of target region would fall into the Burden Population. In this framework, only  
111 Complete Intended Edits (in precise editing) or target site changes leading to a knockout (in  
112 imprecise editing) are considered edits. A formal definition of what is meant by an edit allows  
113 us to develop a more rigorous framework by which to evaluate these complex cell libraries. In  
114 the discussion that follows, the term "edit" refers to Complete Intended Edit unless indicated  
115 otherwise.

|                              |                                  | Repair template |   |   |   |           |   |   |   |   |
|------------------------------|----------------------------------|-----------------|---|---|---|-----------|---|---|---|---|
|                              |                                  | target          |   |   |   | auxiliary |   |   |   |   |
| <b>Reference Sequence</b>    |                                  | T               | A | C | G | G         | T | T | T | C |
| <b>Designed Sequence</b>     |                                  | A               | C | T | G | G         | A | T | T | T |
| <b>Complete and Intended</b> |                                  | A               | C | T | G | G         | A | T | T | T |
|                              | <i>complete, but unintended</i>  | A               | C | A | G | G         | A | T | T | T |
|                              | <i>incomplete and unintended</i> | A               | C | A | G | G         | T | T | T | C |
| <b>Burden</b>                | <i>Incomplete</i>                | T               | A | C | G | G         | A | T | T | T |
|                              | <i>Incomplete</i>                | A               | C | T | G | G         | T | T | T | C |
|                              | <i>unedited</i>                  | T               | A | C | G | G         | T | T | T | C |

116

117 **Figure 1.** Challenges of edit identification in a large pool of precisely edited cells. A complete and intended edit  
 118 occurs only when the complete repair template is faithfully placed in the genome; this includes the desired edit  
 119 and any auxiliary edits made to prevent recutting of the edited locus. Cases where only part of the repair template  
 120 are incorporated into the genome are considered incomplete and count as burden rather than an edit, even if they  
 121 include the desired variant. Any other unintended or unedited cells are also considered part of the burden.

## 122 Estimation of the Edit Fraction

123 The Edit Fraction is a critical component of characterizing a massively parallel genome  
 124 engineered library. Ideally, we would like to identify all edits that occurred within a population.  
 125 In practice, this is challenging because of the mosaic nature of the library; at any given locus,  
 126 the count of reference sequence representation will far exceed the count of edit-containing  
 127 sequences. Fortunately, determination of the overall Edit Fraction does not require complete  
 128 evaluation of all members of the library. We describe two approaches for identifying the Edit  
 129 Fraction in a library: a shallow sampling of the library by deeply sequencing isolates or a deeper  
 130 sampling of the library by shallow sequencing of a pool of cells (Figure 2).

131 One way to assess the Edit Fraction is to sample isolates selected from the population (Figure  
 132 2A). After sufficient cell divisions, standard sequencing approaches, such as whole genome  
 133 shotgun (WGS) of each isolate, can be employed. This requires only collection and growth of  
 134 isolates (typically by low density plating and picking single colonies into a 96-well plate) and  
 135 library preparation. While this produces a large number of reads outside of the targeted locus  
 136 that do not contribute to edit detection, these reads can be assessed for off-target events.  
 137 Alternatively, one could take an approach to identify the design reagent in each isolate (see  
 138 below), and then use a targeted sequencing approach, such as hybrid capture or genomic  
 139 amplification, to confirm the validity of the edit. This approach has the benefit of more  
 140 efficiently utilizing sequencing reads but takes longer and requires two library preparations, in  
 141 addition to the creation of custom reagents for each edit locus. Regardless of whether whole

142 genome or targeted sequencing is performed, this isolate evaluation approach generally  
143 results in very shallow sampling of a library.

144 An alternative approach to characterizing the Edit Fraction in a library employs limited WGS on  
145 the entire population of cells at a shallow read depth, an approach we term pooled WGS  
146 (pWGS) (Figure 2B). While the population of cells used as input for this analysis may number in  
147 the millions, the cost of sequencing will typically limit the number of cells ultimately sampled,  
148 often in the range of a few hundred to a few thousand. For example, if an experiment involves  
149 sequencing to an average genomic coverage depth of 1000x, it will profile approximately 1000  
150 cells' worth of DNA at each targeted edit locus. In contrast to isolate sampling, the pooled  
151 approach limits the manual work of colony isolation and growth at the expense of greater  
152 complexity in sequence analysis. If a pWGS assay is tuned to sequence roughly 1000 genomes'  
153 worth of DNA per locus, then for an edit library of 1000 or more members, the assay should be  
154 viewed as a sampling of mainly the right tail of the edit frequency distribution. Sampling  
155 deeper would require substantially more sequencing, on the order of billions of read pairs or  
156 more (Figure 3D and supplemental section 8). Even though the pWGS sampling depth is  
157 typically shallow and thus incapable of providing reliable data on a pre-design basis, the sum of  
158 the per-design Edit Fractions produces a reliable estimate of the overall Edit Fraction in the  
159 library (Figure 3A). In either the isolate or pWGS approach, many edits that are present in the  
160 pool will be missed in the sequencing results due to being present at very low frequency  
161 relative to the per-locus sampling depth. Despite the absence of many of the edits in the  
162 sample, making the assumption that the underlying edit frequencies follow a parametric  
163 distribution can allow for reliable estimation of the Edit CV (Table 1 and Figure 3D). In  
164 situations where the edits are clustered in a subset of the genome, targeted sequencing  
165 approaches can provide a more cost-efficient readout of the edit frequencies. Assay replicates  
166 will provide differing parameter estimates due to sampling biases in the context of shallow  
167 coverage; therefore, inspection of confidence intervals is helpful to guide appropriate  
168 interpretation.

169

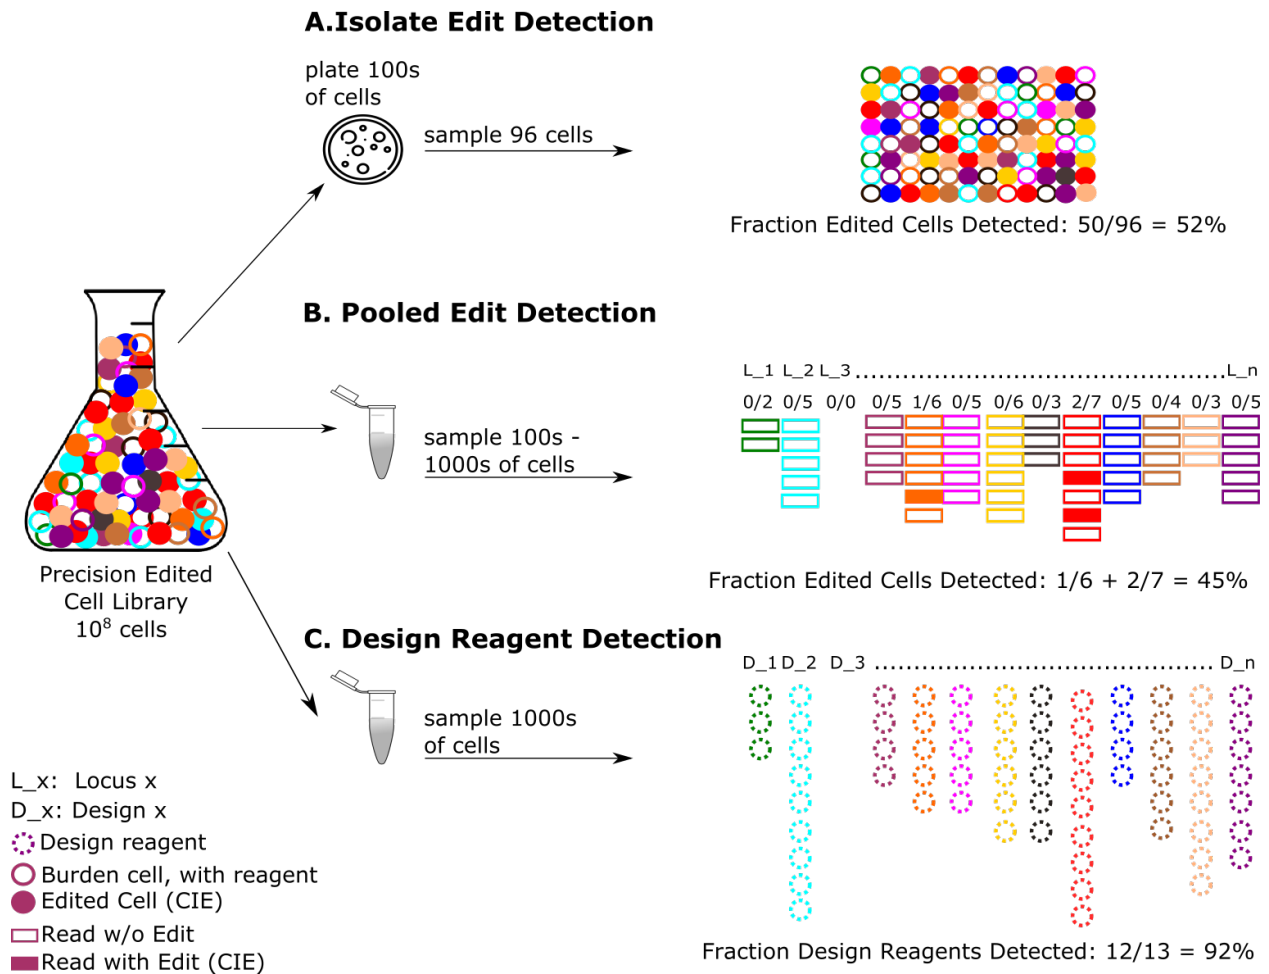

170

171

172 **Figure 2.** Measurements of interest when evaluating a multiplex precisely edited library. This simplified example  
 173 is based on a contrived library targeting 13 distinct edits, with half of the cells in the pool containing a Complete  
 174 Intended Edit and 12 of the designs represented. Open circles represent cells of the Burden Population, most of  
 175 which will contain editing reagents if selection pressure is maintained. Dashed circles represent the design  
 176 reagent. Rectangular boxes represent sequence reads, open are wild type while filled are Complete Intended Edit-  
 177 containing reads. **A.** A shallow library sampling but deep sequencing approach involves edit detection by  
 178 selecting isolates and performing whole genome shotgun (WGS) analysis. For the isolates selected, this can  
 179 provide detailed edit data, as well as information on any unintended events, but the approach samples only a  
 180 small number of cells in the library. It is important to use sufficiently deep sequencing on each isolate to provide  
 181 good power for detecting edits. **B.** An alternative approach involves doing a broad library sampling but shallow  
 182 sequence assessment of the library to obtain an estimate of the fraction of cells containing an edit. As with the  
 183 previous approach, many individual edits that are present in the pool will be absent from the sample;  
 184 nevertheless, an estimate of Edit Fraction  $f$  can be obtained by summing the fraction of edited reads at each locus  
 185 (designated by L<sub>x</sub>). At approximately 1000x coverage and with Edit Fraction  $f$ ,  $1000f$  edited cells will be sampled.  
 186 Increasing read depth will increase the number of cells sampled, but very high coverage would be required to  
 187 deeply assay at each edit locus. **C.** Design distribution can be measured directly from the reagents, typically  
 188 through a short-read sequencing (NGS) assay using amplification handles. The reagents will be detected in both  
 189 the edited and Burden Populations, and this assay will not distinguish those populations.

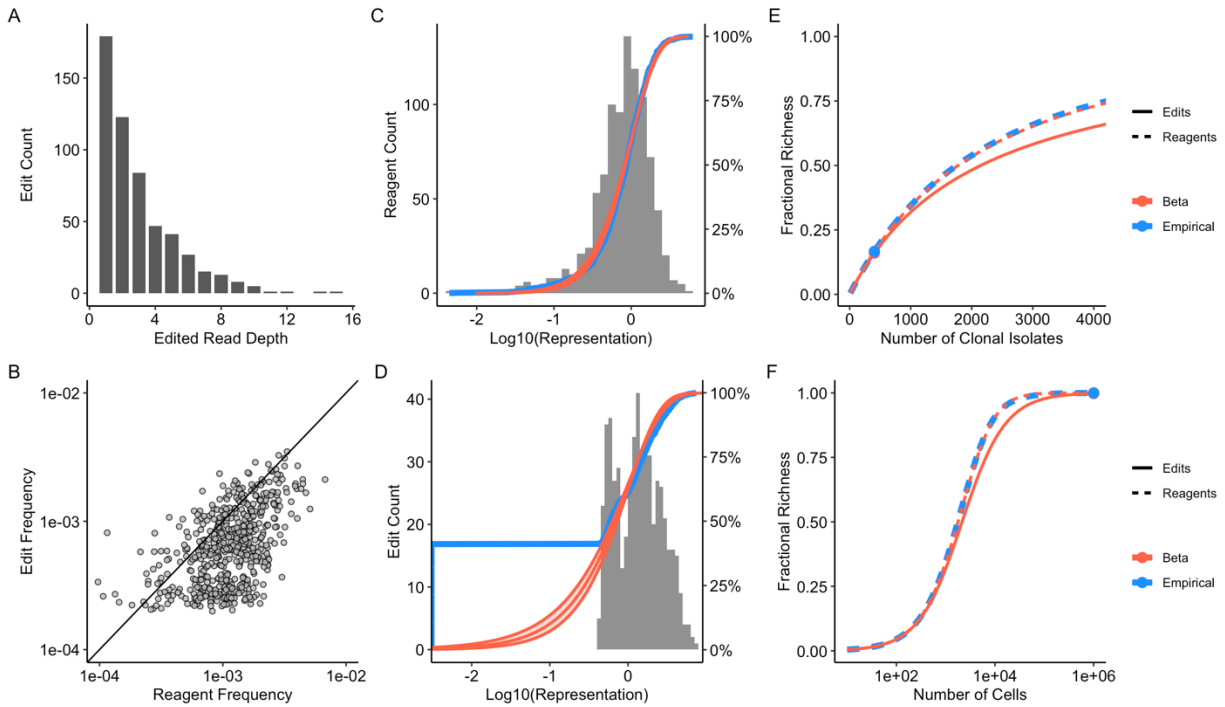

190

191

192 **Figure 3:** Example usage of pWGS and design reagent amplicon sequencing assays to characterize an E. coli edit  
193 library. After exclusion of controls, the library consists of 928 designs including insertions, deletions and  
194 substitutions spanning the genome. The resulting edits are not expected to result in any notable effects on  
195 cellular fitness. **A:** Number of sequencing reads with exact match to expected edits in a pWGS run. The pWGS run  
196 included 157M 2x150 read pairs. After exclusion of reads failing quality filters the mean coverage depth fully  
197 spanning the targeted edits is 3434. Summing the per-locus Edit Fractions produces an estimate of 0.44 for the  
198 overall Edit Fraction in the pool, thus the pWGS run profiles approximately 1501 genomes' worth of DNA overall.  
199 A total of 1615 edited reads is seen, comprising 546 unique edits (y-axis) with read depth per edit ranging from 1  
200 to 15 (x-axis). **B:** Scatterplot comparing the edit frequencies estimated from pWGS with design reagent  
201 frequencies estimated from amplicon sequencing of reagents. **C:** Histogram and cumulative distribution function  
202 (CDF) of reagent representation (defined as the product of reagent frequency and library size), measured by  
203 amplicon sequencing of the design reagents. The assay consists of 3.0M reads. Fitting the design reagent  
204 frequencies to a beta distribution via maximum likelihood estimation (MLE), the data are well described by a beta  
205 distribution with mean  $1/928$  and CV 0.73. **D:** Histogram and CDF as in C, but for the representation of edits as  
206 measured by pWGS. Given that the pWGS run is sampling roughly 1501 genomes' worth of DNA per locus, it  
207 should be viewed as a sampling of mainly the right tail of the edit frequency distribution. The fraction of the edit  
208 library that is observed at least once is 0.59. Fitting edit frequencies with a beta distribution via MLE, the estimate  
209 of CV is 1.01. Observation of a greater fraction of all possible edits in the library would require substantially more  
210 sequencing. For example, if the goal were to directly observe 90% of the edits in pWGS, it would require detection  
211 of edits whose frequencies among the 44% of edited cells is around the 10th percentile of the reagent frequency  
212 distribution, or  $1e-4$ . Aiming for an expected edit read count of 10, to have a reasonable chance of observing edits  
213 at the 10th percentile, it would take a mean coverage depth of 213K. This is 62-fold larger than the actual  
214 coverage depth for the pWGS run, which would require a total sequencing throughput of 9.8B read pairs. **E:**  
215 Screener's curve, showing the predicted Reagent Fractional Richness (solid curve) and Edit Fractional Richness  
216 (dashed curve) as a function of the number of clonal isolates phenotyped in a screening experiment. The red  
217 curves are based on a beta binomial model fit. The blue curve is a prediction based on the nonparametric estimate  
218 of the distribution of reagent frequencies, a nonparametric fit to the edit frequencies is not useful given the



219 limited sampling depth of the pWGS data. The point indicated on the curve corresponds to the Screener's score,  
220 which is the predicted Edit Fractional Richness when sampling depth is equal to the library size times the Edit  
221 Fraction. F: Selector's curve, showing the same data as in E but with the x-axis changed to log scale and domain  
222 extended to cover the deep sampling that is typically relevant for the large number of cells sampled in selection  
223 applications. The solid point indicated on the curve corresponds to the Selector's score, which is the predicted  
224 Edit Fractional Richness when sampling  $1M$  cells.

## 225 **Estimation of Reagent Distribution**

226 Direct detection of edits in massively parallel editing libraries is ideal for assessing library  
227 diversity, but in practice it is often prohibitively expensive due to the depth of sequencing  
228 required. In lieu of extensive genomic sequencing, many approaches make it relatively  
229 straightforward to detect the reagents conferring edits, so profiling the reagent distribution  
230 can be a useful proxy for the edit distribution. Typically, each cell contains multiple clonal  
231 reagent copies, and most reagents will be present in hundreds to thousands of cells. Ideally, all  
232 designs would be equally represented, but in practice most libraries have a distribution of  
233 representation. Every manipulation of the library (reagent manufacturing, transformation,  
234 growth of the cell population) introduces an opportunity to alter this distribution.  
235 Understanding the distribution of reagents is critical for interpreting phenotyping results and  
236 will help define the effect size and significance of results. For example, if a phenotyping  
237 approach is assessing depletion of reagents as a measure proxy for genotype (a common  
238 approach in essential gene screens), designs in the extreme left tail of the distribution will likely  
239 be underpowered for association with a phenotype.

240 Sequencing the reagent library throughout the experimental process provides useful insight  
241 into how various manipulations can impact design reagent distribution. This approach can be  
242 useful for approximating edits post-phenotyping, particularly in the case of strong selective  
243 pressure. In a library containing a mixture of active and inactive gRNA-donor cassettes, the  
244 number of viable edited cells is tightly coupled to gRNA activity, rate of homology directed  
245 repair (HDR) and the relative survival rate of edited members of the population. DNA synthesis  
246 errors that result in unintended editing events during the homology-directed repair process or  
247 poor transformation efficiency can impact uniform representation of intended edits (Roy et al.  
248 2018). These effects can reduce the effective diversity in an edited library, directly impacting  
249 the success of phenotyping. For instance, edited variant libraries may lack the desired intended  
250 diversity due to editing process failures or takeover by a sub-population of a particular  
251 Complete Intended Edit, unintended edits or unedited cells. In each of these cases, the cost  
252 and effectiveness of phenotypic investigations will be adversely affected.

253 Typically, short read sequencing (NGS) of the reagent is used to determine the library  
254 distribution from a sample of the library (Fig 2C). Approaches that either detect a barcode  
255 (Garst et al. 2017; Sadhu et al. 2018) or the reagents themselves (Bao et al. 2018; Sharon et al.  
256 2018) are used. It is assumed that the read counts for a design reagent are proportional to the  
257 number of cells containing that design; thus, a read count is equivalent to a design reagent  
258 count. The dispersion of the distribution is measured by the Reagent CV (Table 1, Figure 3C).  
259 Larger Reagent CV values indicate greater variance in the relative abundances of the designs,

260 which can lead to under- or overrepresentation of individual designs. Prior to applying selective  
261 pressure, a small Reagent CV is preferable for all phenotyping approaches, though libraries  
262 with larger Reagent CVs can still be useful for some experiments. It is important to note that  
263 while the Reagent CV is a useful and accessible metric, what matters most for many  
264 applications is the **Edit CV** (Table 1). If every design reagent has an equal probability of  
265 producing an edit, the Reagent CV and Edit CV will be equal to one another. In most real-world  
266 situations there are various sources of bias, including those mentioned above, which result in  
267 the Edit CV being larger than the Reagent CV, to an extent that will depend on the  
268 experimental context (Figure 3D).

269 We have introduced measures that can be useful for describing aspects of a massively parallel  
270 edited cell library. We next introduce approaches for combining these measures to produce  
271 metrics that can be utilized for evaluating these libraries.

## 272 **Metrics for Library Evaluation**

273 In this section we define several concepts that utilize the above measurements to provide a  
274 fuller characterization of a library. Neither Edit Fraction nor reagent distribution alone can fully  
275 characterize the utility of a library. When sampling a library with a high Edit Fraction but poor  
276 representation of some or many library members, any phenotyping regime will be continually  
277 sampling only a small subset of the desired variation. Alternatively, even representation of the  
278 designs with a poor Edit Fraction will lead to over-sampling of the Burden Population. Different  
279 phenotyping approaches will be more or less tolerant to deviations in either Edit Fraction or  
280 design reagent distribution. Below, we describe metrics that combine these two measures into  
281 a score that can be used to quickly assess the utility of a given library.

### 282 **Edit Library Richness**

283 When sampling cells or isolates from an engineered cell library, the quantity that is typically  
284 most important is the number of unique edits represented in the sample. Borrowing from the  
285 ecological literature, the term “richness” is used to refer to the number of unique edits in the  
286 sample from the library (Levin et al. 2012). The expected richness  $\mu_m$  of a sample of  $m$  cells or  
287 isolates from a library of  $S$  edits can be predicted given  $f$ , the fraction of cells that contain an  
288 edit, and the frequencies  $p_i$  of each edit among the edited cells.

$$\mu_m = S - \sum_{i=1}^S (1 - fp_i)^m$$

289  
290 As with other measures, the variance of the sample’s richness can be calculated (supplemental  
291 section 1). For some approaches, a variant will need to be observed more than once to provide  
292 statistical power for making the genotype-phenotype correlation. In these cases, there is a  
293 tractable generalization for when richness is defined in terms of needing at least  $n$

294 observations of each edit (supplemental section 2). This is useful in cases where the dynamic  
295 range of quantification relies on a set number of observations of the edit. There is an accurate  
296 approximation for the mean and variance of richness, useful both for its mathematical  
297 convenience and because it reduces computational complexity from  $O(n^2S^2)$  to  $O(nS)$   
298 (supplemental section 3).

299 Under the assumption that all designs have equal probability of conferring their edits,  
300 measurements of reagent frequencies and of the Edit Fraction can be used to predict the  
301 richness in a variety of circumstances. It is useful to plot the predicted richness against the  
302 number of cell isolates evaluated in a screen or selection, producing a "Screener's Curve"  
303 (Figure 3E, 4E and 5C) or a "Selector's Curve" (Figure 3F, 4F and 5D). These plots serve as a  
304 guide to set expectations of what fraction of an edit library will be probed in a screen or  
305 selection.

306 The appropriate sample size  $m$  from which to make richness predictions will depend strongly  
307 on the particular situation. In some cases, the cost of phenotyping each sample is high, and the  
308 sample size needs to be kept small for practical reasons. In other cases, deep sampling is  
309 affordable, and many cells can be sampled. To be able to quantify a library's suitability for  
310 screening and selection applications, and to be able to do so in the absence of an estimate of  
311 Edit Fraction, two metrics are introduced - the Screener's Score and the Selector's Score. The  
312 Screener's Score is defined as the expected Edit Fractional Richness when sampling  $S$  times (a  
313 1-fold sampling of the library) and with Edit Fraction set to 0.3. The maximum possible value  
314 for the Screener's Score is  $1 - e^{-0.3}$  or 0.26 (supplemental section 4). The Selector's Score is  
315 defined as the expected Edit Fractional Richness when sampling  $10^6$  times (a reasonable  
316 number of input cells for a selection protocol), with the same Edit Fraction of 0.3. The  
317 Selector's Score can take on any value in the range  $[0,1]$ . These scores are intended to be  
318 general measures and more detailed information concerning the Edit Fraction would make this  
319 estimate more accurate. Figure 4 illustrates how these concepts can be used to quantitatively  
320 assess different libraries for screening and selection purposes.

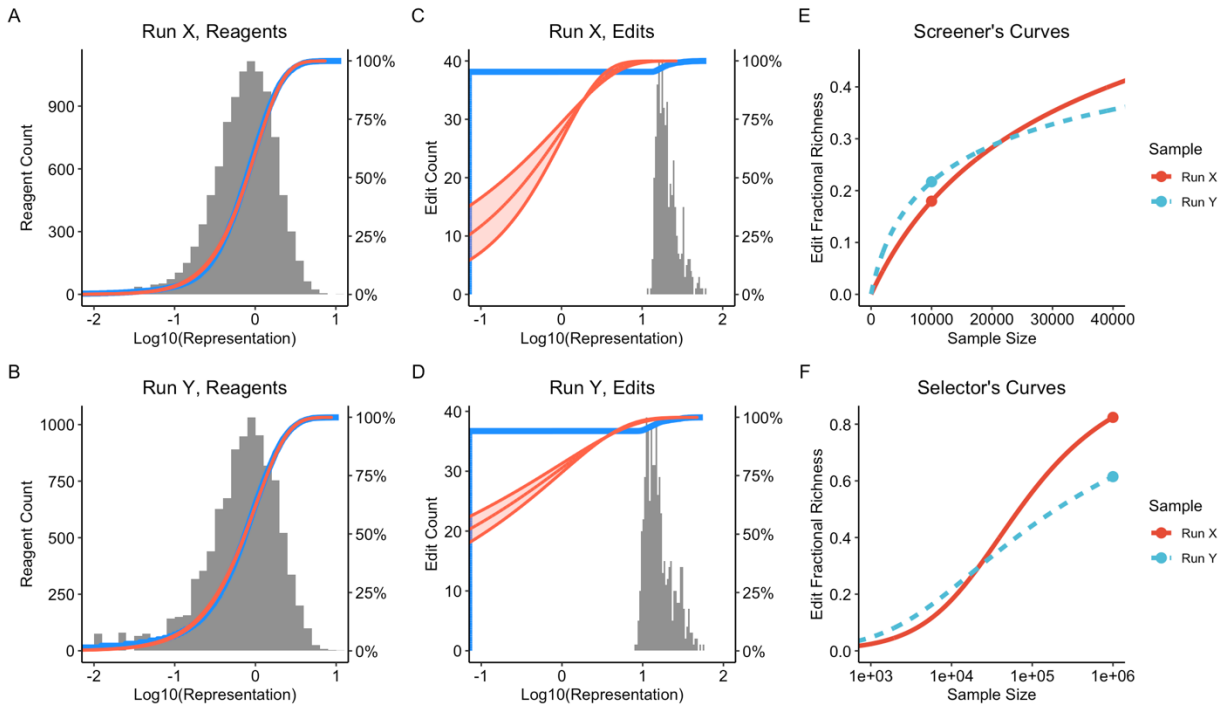

321  
322

323 **Figure 4:** Comparative evaluation of two runs of a 10,000 member *E. coli* library, the runs are named X and Y. **A**  
 324 and **B:** histogram and CDF (blue) of design frequencies as determined by deep amplicon sequencing of the  
 325 reagents. The red curves correspond to beta distributions fit by Maximum Likelihood Estimation (MLE). The  
 326 estimates for Reagent CV are 0.79 and 0.90 for runs X and Y respectively. **C** and **D:** histogram and CDF (blue) of  
 327 genomic edit frequencies as determined by pWGS. The red curves are beta distributions fit by MLE, the shaded  
 328 area spans the 95% confidence interval for the edit CV estimates. The estimated edit CVs are 1.54 and 2.48 for  
 329 runs X and Y respectively. The pWGS assay is a shallow sampling of edits, with an estimated sampling depth of  
 330 488 and 724 in runs X and Y respectively, which is very small compared to the library size of 10,000. The pWGS  
 331 assay also enables estimation of Edit Fraction, the estimates are 0.25 and 0.57 for runs X and Y. Run X has a lower  
 332 Edit Fraction but also a lower edit CV compared to run Y, so determination of which run is better to use in  
 333 downstream applications will depend on the situation. **E:** Screener's curves plotting predicted Edit Fractional  
 334 Richness against sample size for the two runs. The points on the curves correspond to the Screener's Scores using  
 335 the estimated Edit Fractions. For a screen of 20,000 or fewer isolates (twice the library size), run Y is predicted to  
 336 yield greater Edit Fractional Richness, with its larger Edit Fraction making up for its larger edit CV. **F:** Selector's  
 337 curves, like E but with the x-axis expanded to span a range more typical for a selection application. The points on  
 338 the curves denote the Selector's Scores, the predicted Edit Fractional Richness when sampling  $10^6$  cells. The lower  
 339 edit CV of run X makes it a better choice for a selection application, despite it having less than half the Edit  
 340 Fraction of run Y.

341 When an estimate of Edit Fraction is available to complement the estimates of design reagent  
 342 frequencies, the Empirical Screener's Score and Empirical Selector's Score can be evaluated in  
 343 a similar manner, replacing the fixed assumption of 0.3 Edit Fraction with the empirically  
 344 determined estimate (Figure 3D). These curves aid in understanding the best phenotypic  
 345 approaches to take given various library characteristics and experimental goals.

346 **Maximizing Library Richness**

347 The four variables appearing in the expression for richness motivate different approaches for  
348 maximizing the richness of a sample, though in practical applications some of the approaches  
349 may be inaccessible (supplemental section 4). The first approach is the obvious one of  
350 increasing the sample size – the larger the sample, the greater the richness. The second  
351 approach is to increase the probability  $f$  that a design reagent confers an edit - something that  
352 can be achieved, for example, by improving models for gRNA design. The third approach is to  
353 increase the library size  $S$ . Lastly, the edit CV has a direct impact, with more evenly distributed  
354 libraries resulting in greater richness.

355 For a sample of size  $m$  from a library of size  $S$  with Edit Fraction  $f$ , the maximum richness  
356 possible is  $S \left(1 - e^{-\frac{mf}{S}}\right)$ , attained for a perfectly even library where all design reagent  
357 frequencies are equal to  $1/S$  (supplemental section 4).

### 358 **Predicting Library Richness**

359 The predictor of library richness introduced above requires an estimate of the frequency of  
360 every member of the library. In some situations where deep sampling from the library is  
361 feasible it will be possible to get good frequency estimates, but for large libraries it is often  
362 desirable to be able to predict richness from shallow sampling, to help guide decisions about  
363 when to proceed with deep sampling.

364 The problem of predicting future richness from an initial sampling is commonly referred to as  
365 the unknown species problem in ecology, one of the earliest solutions was the Good-Toulmin  
366 estimator (Good and Toulmin 1956). The Good-Toulmin estimator is a nonparametric  
367 approach which works well for predicting up to twice the depth as available in the initial  
368 sample but beyond that it becomes unstable. An improved nonparametric approach  
369 introduced the use of rational function approximations to produce stable estimates at  
370 sampling depths orders of magnitude larger than the initial sample (Daley and Smith 2013) and  
371 subsequent work extended the approach to predict richness when requiring more than one  
372 observation of each library member (<https://arxiv.org/pdf/1607.02804.pdf>).

373 An alternative approach is to assume a parametric model to describe the library frequencies. A  
374 benefit of the parametric approach is that it can produce good estimates from shallow  
375 sampling, as long as the model is a good fit for the underlying data. The beta distribution,  
376 described by two parameters, is a natural model to consider and one that is often an excellent  
377 fit for genome editing libraries (Figures 3, 4, S4). When using a model for design reagent  
378 frequencies where the total library size is known, a constraint is needed to ensure that the  
379 frequencies sum to 1, or equivalently, to ensure their mean is  $1/S$ ; as a result, there is only one  
380 free parameter. It turns out to be convenient to use the CV as the free parameter. When design  
381 reagent frequencies follow a beta distribution, there is a closed-form solution available for the  
382 expected Edit Fractional Richness, where Edit Fractional Richness is defined as the Edit  
383 Richness scaled by the library size (supplemental section 6). For a beta model, Edit Fractional  
384 Richness depends on only two parameters - the CV of the design reagent frequencies  $c$ , and

385 the sampling fraction  $F$ , defined as  $mf/S$ , which can be thought of as the effective fraction of  
386 the library that is profiled in a sampling of  $m$  cells (Figure 5). The expected Edit Fractional  
387 Richness  $\mu_{m,n}$  where at least  $n$  observations of an edit are required, is well approximated as

$$\frac{\mu_{m,n}}{S} = 1 - \sum_{k=0}^{n-1} \left( \frac{1}{1 + Fc^2} \right)^{\frac{1}{c^2}} \left( 1 - \frac{1}{1 + Fc^2} \right)^k \binom{1/c^2 + k - 1}{k}$$

388

389 Consistent with the expression for Edit Fractional Richness, the number of observations of  
390 each edit in the sample follows a negative binomial distribution with failure probability set to  
391  $1/(1 + Fc^2)$  and failure count set to  $1/c^2$ . There is also an expression for the variance of  
392 richness (supplemental section 6). These expressions can be used with the delta method to  
393 account for uncertainty in the estimates of CV and Edit Fraction, enabling construction of  
394 confidence intervals for Screener's and Selector's curves.

395 Supplemental section 9.3 presents a comparison of parametric and nonparametric estimators  
396 of richness on some empirical data.

## 397 **Applying These Estimates and Metrics**

398 Massively parallel genome engineered libraries provide rich diversity for a variety of  
399 applications. The framework described above can be applied to experimental design, library  
400 evaluation and comparing results from different approaches. Below, we describe using this  
401 framework to evaluate libraries for utility in either forward engineering or genome discovery  
402 applications.

### 403 **Forward Engineering Experiments**

404 Forward Engineering of biological systems relies on effective methods to generate beneficial  
405 genetic diversity to provide the fuel for evolutionary optimization (Fox and Giver 2011).  
406 Screening of isolated genetic variants that drive improved phenotypes becomes an exercise in  
407 maximizing richness while managing sampling depth. As noted above, increasing the library  
408 size is a way of maximizing richness. Shallow screening of large libraries has proven to be an  
409 efficient way to maximize the beneficial diversity rate, as most of the genotypes observed are  
410 likely to be unique at lower sampling depth (Alvizo et al. 2014).

411 The effects of library size, Edit Fraction and Edit CV for screening experiments is shown in  
412 Figure 5. The discovery rates for libraries with differing Edit CVs are plotted, showing the effect  
413 to which libraries with higher variance in the distribution of the population forces much deeper  
414 screening in order to continue to observe unique variants. For forward engineers seeking  
415 simply to maximize the discovery rate of beneficial diversity, a shallow sampling from a large  
416 library is a particularly effective approach. For shallow sampling, the impact of Edit CV on Edit  
417 Fractional Richness is modest, as few of the sampled variants are duplicates. Conversely, with

418 deeper sampling (where researchers desire observing the highest fraction of designs) the  
419 effect of a larger Edit CV becomes more limiting. As the Edit CV of the library population  
420 increases, it becomes increasingly difficult to observe those designs present at the lower  
421 frequencies in the population. Edit Fraction has a linear effect on screening outcomes - halving  
422 the edit rate while doubling the sample size results in no net change in expected richness.

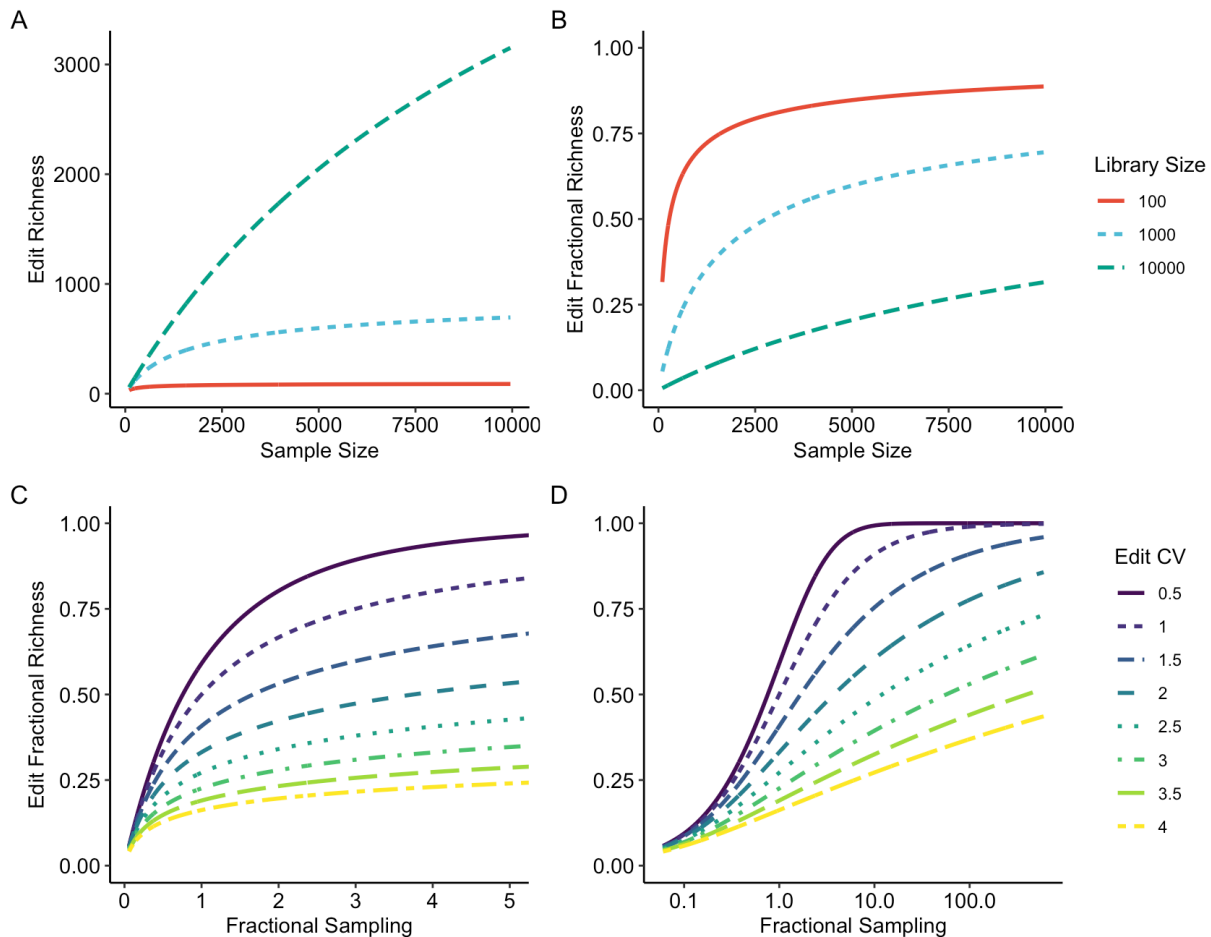

423  
424  
425  
426 **Figure 5:** Exploration of richness under the assumption that edit frequencies follow a beta distribution. **A:** Edit  
427 Richness for different library sizes, assuming an Edit CV of 1.5 and an Edit Fraction of 0.6. **B:** Edit Fractional  
428 richness for the same scenarios as used in A. **C:** Screener's curves, showing Edit Fractional Richness as a function  
429 of Fractional Sampling, with different values for edit CV. Fractional Sampling is defined as the product of  
430 sampling depth (the number of cells or isolates sampled) and Edit Fraction divided by the library size. Fractional  
431 Sampling and Edit CV are all that is required to predict Edit Fractional Richness under the beta assumption. **D:**  
432 Selector's curves, which are the same figure as C with a log-scale x-axis to enable prediction of Edit Fractional  
433 Richness with the deep sampling that is typically used for a selection experiment

434

## 435 Genome Discovery

436 While forward engineering is driven largely by the identification of desired phenotypes,  
437 genome discovery is often focused on testing specific variants to determine if they drive a  
438 phenotype. In this case, a researcher may be more interested in observing all, or most, variants  
439 within a library several times in order to develop robust hypotheses around genotype-  
440 phenotype correlations. In this case, maximizing library coverage may be the most beneficial  
441 approach. When employing an isolate phenotyping approach, this will likely require minimizing  
442 library size so that the edits can be sampled multiple times. When employing a selection  
443 strategy, increasing library size may be appropriate if Edit CV is held low. This will be driven by  
444 the number of times a researcher wants to observe edits in the left tail of the distribution. For  
445 more precise genotype-phenotype correlations, assessing more libraries containing a smaller  
446 number of edits will likely yield more robust results. Strategic use of the Screener's and  
447 Selector's Scores in planning experiments can maximize outcomes by informing sampling  
448 depth needed to robustly associate genotypic changes with phenotypes of interest.

## 449 **Conclusions**

450 As technology continues to improve, the ability to create larger libraries with precise edits will  
451 become commonplace. To date, no common standards exist for describing and evaluating cell  
452 libraries. This makes comparing libraries produced using different approaches challenging.  
453 Perhaps more importantly, a lack of common standards makes planning experiments and  
454 evaluating libraries as fit-for-purpose challenging, and these measures differ from lab to lab.  
455 Here, we have proposed a framework for evaluating massively parallel libraries of genome  
456 engineered cells. We have provided precise definitions around what constitutes an edit. While  
457 previous groups have often looked at the reagents within a complex cell library, we  
458 demonstrate the value of measuring the fraction of cells within the pool that actually contain  
459 an edit and we introduce methodology to directly profile the distribution of edit frequencies.  
460 This provides for robust characterization of library properties without needing to employ  
461 expensive and labor-intensive approaches to understand editing at every target site. We  
462 introduce the concept of edit library richness to more fully describe a library quantitatively, as  
463 the Edit Fraction is insufficient to fully characterize a library's quality. When generating a  
464 complex editing library, it is valuable to have a large percentage of the designs represented in  
465 the final population, not just have a large Edit Fraction that all contain the same, or a few edits.  
466 We also provide models and methods that allow predictions of library quality when some key  
467 metrics, typically Edit Fraction, are not available. Development of a robust framework for  
468 evaluating complex cell libraries will be necessary to inform which approaches will be useful for  
469 phenotypic analysis of a library. Establishment of common methods will facilitate comparing  
470 libraries created from various methods. While we have focused on libraries of precise genome  
471 edits, the metrics, models and methods proposed here can be applied to any type of library  
472 conforming to the general statistical assumptions introduced.

473 Copyright ©2021 Inscripta, Inc

474



## 475 Supplemental Materials

476 Mathematical derivations and deeper discussion of the metrics are available in the attached  
477 Supplement. Code and data used for analyses can be accessed online  
478 at [https://github.com/InscriptaLabs/cell\\_lib\\_eval\\_paper](https://github.com/InscriptaLabs/cell_lib_eval_paper).

## 479 Acknowledgements

480 The authors are grateful to Arnold Oliphant, Lior Pachter, and Fritz Roth for their helpful and  
481 insightful feedback

## 482 Author Contributions

483 CGA, SC, CD, ME, SF, RF, MWG, ADG, MSG, PH, TH, SJ, CJ, KJ, NK, SL, BL, TMS, ECS, CAS,  
484 MHS, ST and TT developed the general framework for characterizing a pool of edited cells and  
485 created the novel associated metrics. EA, SA, ME, GG, NK, BL, FP, CDS, TRS, and KW used the  
486 Onyx™ platform to generate the pooled editing data used in this manuscript. MB, DMC, SC,  
487 ME, RF, MSG, TH, BL, JCJR, TMS, CAS, and MHS wrote and/or reviewed the manuscript and  
488 associated figures. JB, SC, TH, SL, TMS, CAS, MHS, and ST derived the mathematical results  
489 in the main text and supplement, and implemented them in bioinformatics pipelines.

## 490 References

- 491
- 492 Alvizo, Oscar, Luan J. Nguyen, Christopher K. Savile, Jamie A. Bresson, Satish L. Lakhapatri,  
493 Earl O. P. Solis, Richard J. Fox, et al. 2014. "Directed Evolution of an Ultrastable  
494 Carbonic Anhydrase for Highly Efficient Carbon Capture from Flue Gas." *Proceedings of*  
495 *the National Academy of Sciences of the United States of America* 111 (46): 16436–41.
- 496 Bao, Zehua, Mohammad HamediRad, Pu Xue, Han Xiao, Ipek Tasan, Ran Chao, Jing Liang, and  
497 Huimin Zhao. 2018. "Genome-Scale Engineering of *Saccharomyces Cerevisiae* with  
498 Single-Nucleotide Precision." *Nature Biotechnology* 36 (6): 505–8.
- 499 Cong, Le, F. Ann Ran, David Cox, Shuailiang Lin, Robert Barretto, Naomi Habib, Patrick D. Hsu,  
500 et al. 2013. "Multiplex Genome Engineering Using CRISPR/Cas Systems." *Science* 339  
501 (6121): 819–23.
- 502 Daley, Timothy, and Andrew D. Smith. 2013. "Predicting the Molecular Complexity of  
503 Sequencing Libraries." *Nature Methods* 10 (4): 325–27.

- 504 Ding, Qiurong, Alanna Strong, Kevin M. Patel, Sze-Ling Ng, Bridget S. Gosis, Stephanie N.  
505 Regan, Chad A. Cowan, Daniel J. Rader, and Kiran Musunuru. 2014. "Permanent  
506 Alteration of PCSK9 with in Vivo CRISPR-Cas9 Genome Editing." *Circulation Research*  
507 115 (5): 488–92.
- 508 Fox, Richard J., and Lori Giver. 2011. "Principles of Enzyme Optimization for the Rapid Creation  
509 of Industrial Biocatalysts." *Enzyme Technologies*.  
510 <https://doi.org/10.1002/9780470627303.ch4>.
- 511 Frangoul, Haydar, David Altshuler, M. Domenica Cappellini, Yi-Shan Chen, Jennifer Domm,  
512 Brenda K. Eustace, Juergen Foell, et al. 2020. "CRISPR-Cas9 Gene Editing for Sickle Cell  
513 Disease and  $\beta$ -Thalassemia." *The New England Journal of Medicine*, December.  
514 <https://doi.org/10.1056/NEJMoa2031054>.
- 515 Garst, Andrew D., Marcelo C. Bassalo, Gur Pines, Sean A. Lynch, Andrea L. Halweg-Edwards,  
516 Rongming Liu, Liya Liang, et al. 2017. "Genome-Wide Mapping of Mutations at Single-  
517 Nucleotide Resolution for Protein, Metabolic and Genome Engineering." *Nature*  
518 *Biotechnology* 35 (1): 48–55.
- 519 Gilbert, Luke A., Max A. Horlbeck, Britt Adamson, Jacqueline E. Villalta, Yuwen Chen, Evan H.  
520 Whitehead, Carla Guimaraes, et al. 2014. "Genome-Scale CRISPR-Mediated Control of  
521 Gene Repression and Activation." *Cell* 159 (3): 647–61.
- 522 Good, I. J., and G. H. Toulmin. 1956. "THE NUMBER OF NEW SPECIES, AND THE INCREASE IN  
523 POPULATION COVERAGE, WHEN A SAMPLE IS INCREASED." *Biometrika* 43 (1–2): 45–  
524 63.
- 525 Hanna, Ruth E., Mudra Hegde, Christian R. Fagre, Peter C. DeWeirdt, Annabel K. Sangree,  
526 Zsofia Szegletes, Audrey Griffith, et al. 2021. "Massively Parallel Assessment of Human  
527 Variants with Base Editor Screens." *Cell* 184 (4): 1064-1080.e20.
- 528 Jinek, Martin, Krzysztof Chylinski, Ines Fonfara, Michael Hauer, Jennifer A. Doudna, and  
529 Emmanuelle Charpentier. 2012. "A Programmable Dual-RNA-Guided DNA  
530 Endonuclease in Adaptive Bacterial Immunity." *Science* 337 (6096): 816–21.
- 531 Levin, Simon A., Stephen R. Carpenter, H. Charles J. Godfray, Ann P. Kinzig, Michel Loreau,  
532 Jonathan B. Losos, Brian Walker, and David S. Wilcove. 2012. *The Princeton Guide to*  
533 *Ecology*. Princeton University Press.
- 534 Mali, Prashant, Luhan Yang, Kevin M. Esvelt, John Aach, Marc Guell, James E. DiCarlo, Julie E.  
535 Norville, and George M. Church. 2013. "RNA-Guided Human Genome Engineering via  
536 Cas9." *Science* 339 (6121): 823–26.
- 537 Roy, Kevin R., Justin D. Smith, Sibylle C. Vonesch, Gen Lin, Chelsea Szu Tu, Alex R. Lederer,  
538 Angela Chu, et al. 2018. "Multiplexed Precision Genome Editing with Trackable

- 539 Genomic Barcodes in Yeast." *Nature Publishing Group*, May.  
540 <https://doi.org/10.1038/nbt.4137>.
- 541 Sadhu, Meru J., Joshua S. Bloom, Laura Day, Jake J. Siegel, Sriram Kosuri, and Leonid  
542 Kruglyak. 2018. "Highly Parallel Genome Variant Engineering with CRISPR-Cas9."  
543 *Nature Genetics* 50 (4): 510–14.
- 544 Sharon, Eilon, Shi-An A. Chen, Neil M. Khosla, Justin D. Smith, Jonathan K. Pritchard, and  
545 Hunter B. Fraser. 2018. "Functional Genetic Variants Revealed by Massively Parallel  
546 Precise Genome Editing." *Cell* 175 (6): 1403–1415. <https://doi.org/10.1016/j.cell.2018.08.057>.
- 547 Wilkinson, Adam C., Daniel P. Dever, Ron Baik, Joab Camarena, Ian Hsu, Carsten T.  
548 Charlesworth, Chika Morita, Hiromitsu Nakauchi, and Matthew H. Porteus. 2021.  
549 "Cas9-AAV6 Gene Correction of Beta-Globin in Autologous HSCs Improves Sickle Cell  
550 Disease Erythropoiesis in Mice." *Nature Communications* 12 (1): 686.
